# Supplementary material for: Fabrication of silver nanoplate hierarchical turreted ordered array and its application in trace analyses
Source: Royal Society of Chemistry journal article supplement (doi:10.1039/c4cc10009c), 2015-01-01
Supplement: c4cc10009c1.pdf [file c4cc10009c1.pdf]

## Supplementary Information

### Fabrication of silver nanoplate hierarchical turreted ordered array and its application in trace analyses

Rongrong Fu,<sup>a,b</sup> Guangqiang Liu,<sup>\*a</sup> Chong Jia,<sup>\*b</sup> Xinhua Li,<sup>a</sup> Xia Tang,<sup>a</sup> Guotao

Duan,<sup>a</sup> Yue Li,<sup>a</sup> Weiping Cai<sup>a</sup>

*a. Key Lab of Materials Physics, Anhui Key Lab of Nanomaterials and Nanotechnology, Institute of Solid State Physics, Chinese Academy of Sciences, Hefei 230031, P.R. China. E-mail: liugq@issp.ac.cn*

*b. School of Materials Science and Engineering, Hefei University of Technology, Hefei, Anhui 230009, P. R. China. E-mail: chongjia@ustc.edu*

**Fig. S1 Rongrong Fu et al**

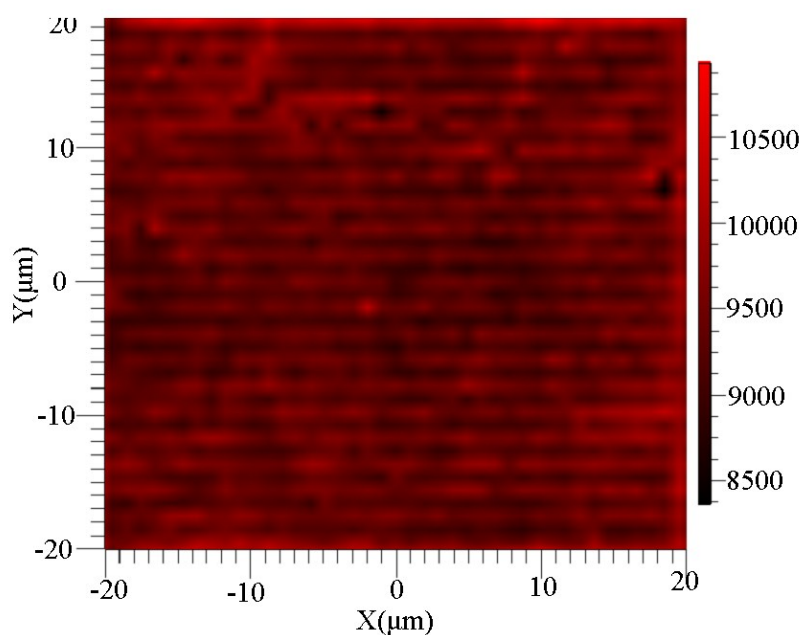

Fig. S1 A: The Raman mapping for the peak of 614cm<sup>-1</sup> of R6G on the 3D orderly turreted silver nanoplates array substrate over an area of 40μm ×40μm. (The Raman spectrometer:Renishaw inVia Reflex, the wavelength 532nm excitation light source, power: 1mW, integral time: 1 s).

**Fig. S2 Rongrong Fu et al**

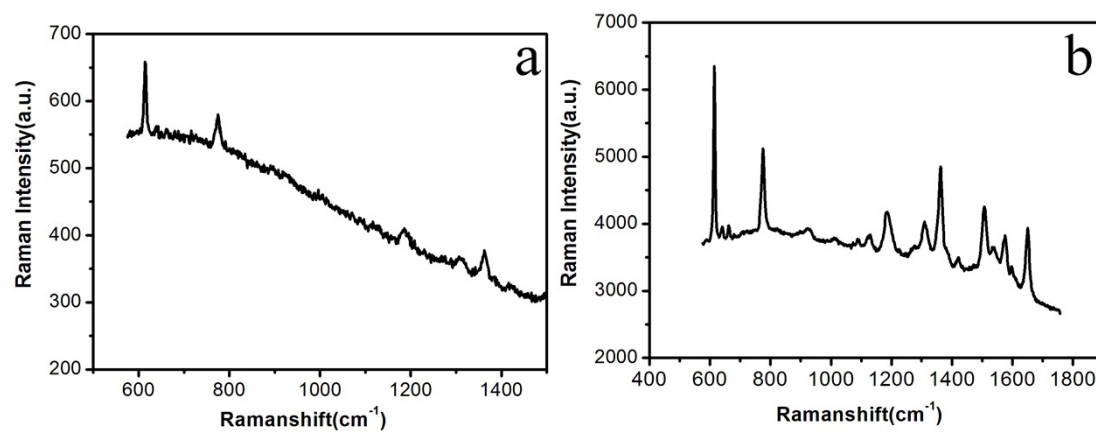

Figure S2 Raman spectra for different samples (Integral time: 1s). (a): regular Raman signal of 10<sup>-2</sup> M R6G solution. (b): Raman signal of 100 μl of 10<sup>-8</sup> M R6G solution dropped on the silver nanoplate built hierarchical turreted ordered array with the projective area 1 cm<sup>2</sup>.
